# Supplementary material for: Efficient and environmentally friendly electrochemical synthesis of the metallacalixarene [Cu(1,3-bdc)·DMF]·2H2O
Source: Royal Society of Chemistry journal article supplement (doi:10.1039/c3ce41679h), 2013-01-01
Supplement: c3ce41679h.pdf [file c3ce41679h.pdf]

## Supplementary Information

Efficient and environmentally friendly electrochemical synthesis of the  
metallacalixarene [Cu(1,3-bdc)·DMF]·2H<sub>2</sub>O.

Joanna Kulesza\*<sup>a,b</sup>, Bráulio Silva Barros<sup>a</sup>, Isadora Maria Vicente da Silva<sup>a</sup>, Gilvaldo Gentil da  
Silva<sup>b</sup> and Severino Alves Júnior<sup>b</sup>

<sup>a</sup>*Escola de Ciências e Tecnologia, Universidade Federal do Rio Grande do Norte (UFRN), Campus  
Universitário Lagoa Nova, 59078-970 Natal, RN, Brazil*

<sup>b</sup>*Departamento de Química Fundamental, Universidade Federal de Pernambuco (UFPE), Av. Prof.  
Moraes Rego, 1235 - Cidade Universitária, 50670-901 Recife, PE, Brazil*

\*corresponding author; postal address: Escola de Ciências e Tecnologia, Universidade Federal do Rio  
Grande do Norte (UFRN), Campus Universitário Lagoa Nova, 59078-970 Natal, RN, Brazil  
email address: kulesza.joanna@gmail.com (J. Kulesza), tel.: +55 84 33422347, fax: +55 84 33422303.

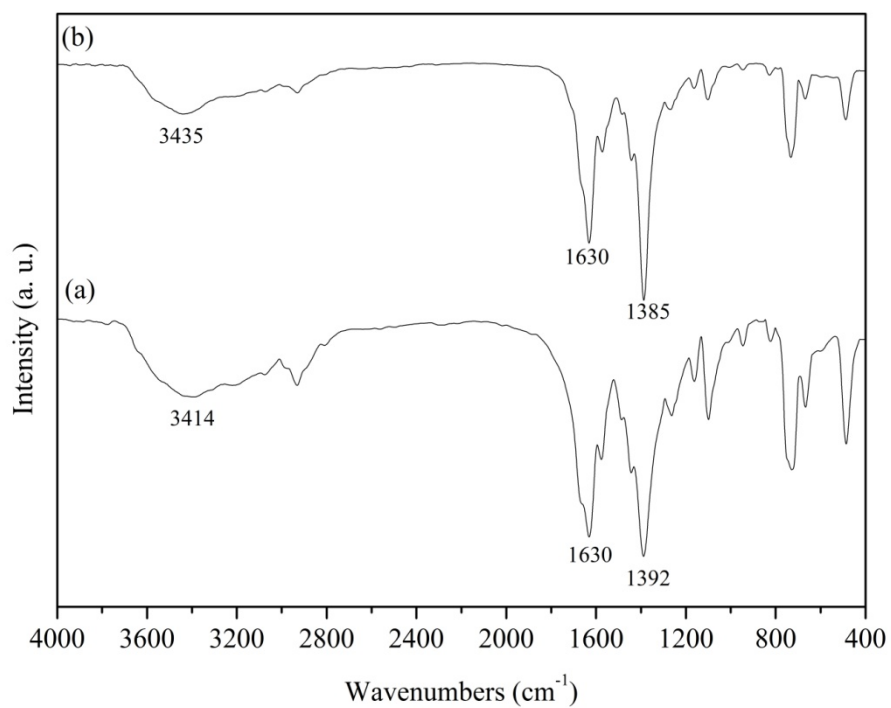

**Fig. S1.** The IR spectrum of Cu-metallacalixarene prepared *via*: (a) slow diffusion at room temperature (b) electrochemical synthesis.

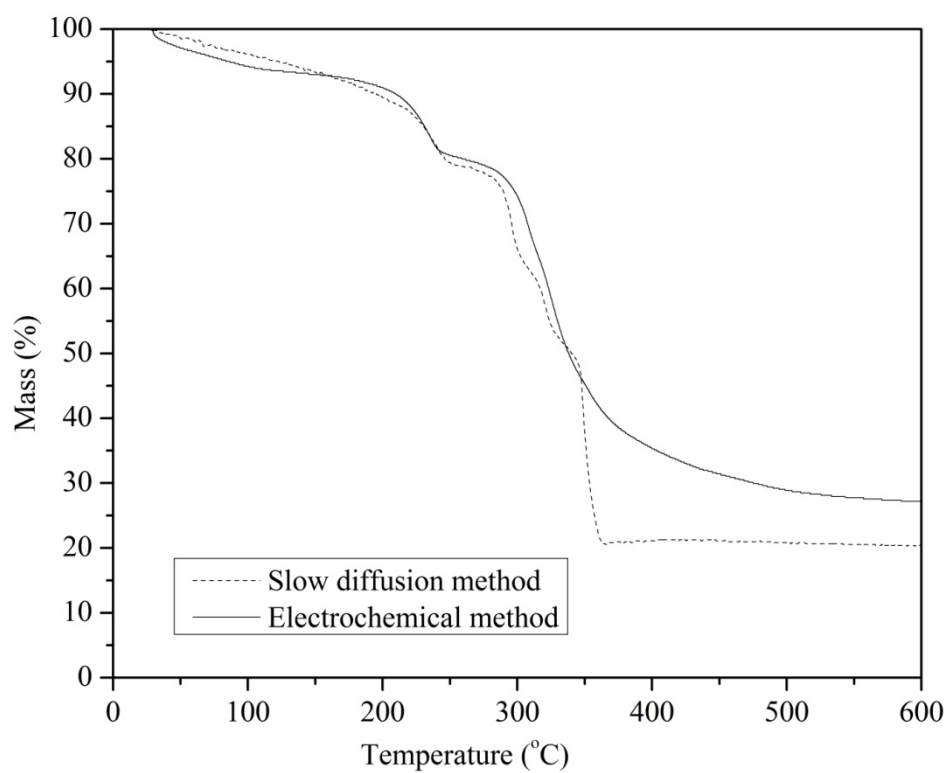

**Fig. S2.** TGA profiles of Cu-metallacalixarene prepared *via*: (a) slow diffusion and (b) electrochemical method.
